# Supplementary material for: Cathode porosity is a missing key parameter to optimize lithium-sulfur battery energy density
Source: PubMed Central journal article supplement (PMC6787095; doi:10.1038/s41467-019-12542-6), 2019-10-10
Supplement: 41467_2019_12542_MOESM1_ESM.pdf [file 41467_2019_12542_MOESM1_ESM.pdf]

## Supplementary Information

### Cathode Porosity is a Missing Key Parameter to Optimize Lithium-Sulfur Battery Energy Density

Ning Kang<sup>a, ‡</sup>, Yuxiao Lin<sup>b, ‡</sup>, Li Yang<sup>c</sup>, Dongping Lu<sup>d</sup>, Jie Xiao<sup>d</sup>, Yue Qi<sup>b\*</sup>, Mei Cai<sup>c\*</sup>

a. Optimal CAE, Inc, Plymouth, MI 48170

b. Department of Chemical Engineering and Materials Science, Michigan State University, East Lansing, MI 48824

c. Chemical and Materials Systems Laboratory, General Motors Global R&D Center, Warren, MI, 48092

d. Pacific Northwest National Laboratory, Richland, WA, 99352

‡ These authors contributed equally to the work.

\*Corresponding author: [mei.cai@gm.com](mailto:mei.cai@gm.com); [yueqi@egr.msu.edu](mailto:yueqi@egr.msu.edu)

## Supplementary Methods

**Diffusion coefficient calculation:** To determine the influence of concentration on Li-PS diffusion, the self-diffusion coefficient  $D$  was calculated with classical MD simulation based on the following equation:

$$D = \frac{1}{6N_a} \lim_{\tau \rightarrow \infty} \frac{d}{d\tau} \sum_{t=0}^{t-\tau} \sum_i^{N_a} [r_i(t + \tau) - r_i(t)]^2 = \frac{1}{6} \lim_{t \rightarrow \infty} \frac{d}{dt} MSD(\tau) \quad (1)$$

Here  $t$  is the simulation time,  $\tau$  is the time interval.  $N_a$  is the total number of atoms in given species.  $r_i(t + \tau)$  and  $r_i(t)$  is the position of atom  $i$  at time  $t + \tau$  and time  $t$ . The MSD of Li<sub>2</sub>S<sub>4</sub> and DME solvent were plotted as a function of time interval  $\tau$  in Supplementary Figure 5a and 5b. The calculated self-diffusion coefficients  $D$  of Li<sub>2</sub>S<sub>4</sub> and DME, as well as the composition, Li-PS concentration in terms of S and simulated density of each solution, were summarized in Supplementary Table 3. A typical snapshot 1.9 M and saturated 8.7 M solution were shown in Supplementary Figure 5c and 5d.

The diffusion coefficient of DME in pure DME solvent and 1.9 M solution were  $23.1 \times 10^{-10}$  and  $19.1 \times 10^{-10} \text{ m}^2 \text{ s}^{-1}$ , respectively. These values are consistent with the calculated value from Park [1] and experimental value from Hayamizu [2], confirming the validity of the force field and the simulation method. In 1.9 M solution, the self-diffusion coefficient of Li<sub>2</sub>S<sub>4</sub> was  $5.6 \times 10^{-10} \text{ m}^2 \text{ s}^{-1}$ . With an increase in Li-PS concentration,  $D(\text{DME})$  and  $D(\text{Li}_2\text{S}_4)$  both drop dramatically. For the saturated 8.7 M solution and over saturated 15.4 M solution, the self-diffusion coefficient of Li<sub>2</sub>S<sub>4</sub> is only  $2.7 \times 10^{-10}$  and  $0.6 \times 10^{-10} \text{ m}^2 \text{ s}^{-1}$ , respectively.

**Comparison between diffusion distance and pore size:** Given the diffusion coefficient, the self-diffusion distance  $x$  of Li<sub>2</sub>S<sub>4</sub> in the first plateau can be further estimated as

$$x = \sqrt{Dt} \quad (2),$$

where  $t$  is the diffusion time. Considering that the first discharging plateau generally contributes 25% of the total theoretical capacity, the diffusion time  $t$  can be estimated at 25% of the total discharging time. Given the fact that an C-rate of  $N$  means the total discharging time is set to be  $1/N$  hours by changing the current density, the estimated self-diffusion distance  $x$  was plotted as a function of C-rate in Supplementary Figure 5e. As we can see, either a higher concentration or a

lower C-rate will result in smaller diffusion distance  $x$ . For the saturated 8.7 M solution, the estimated distance at a typical 0.1 C rate is 1.55 mm. Even for the oversaturated 15.4 M solution at a C rate as high as 2.5, the diffusion distance is still 0.13 mm. Both values were far larger than the pore size (5~10  $\mu\text{m}$ ) in the carbon matrix. That means the  $\text{Li}_2\text{S}_4$  diffusion in the cathode region is still fast enough in the cathode region, which is against the proposed diffusion mechanism.

## Supplementary Figures

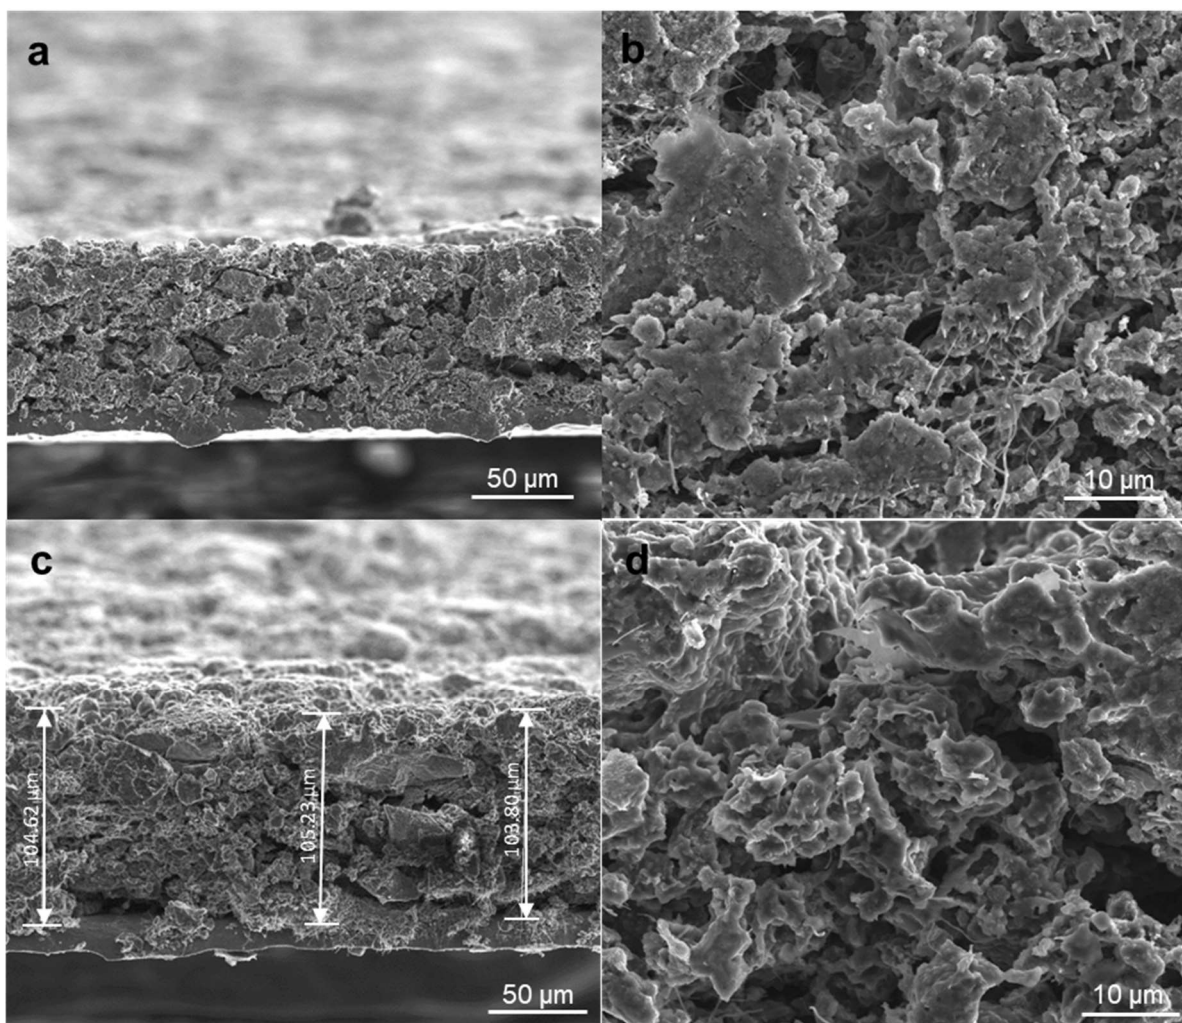

**Supplementary Figure 1.** Cross section SEM images of sulfur cathode with porosity of 40% (a,b) with initial thickness of 60  $\mu\text{m}$  and 50% (c,d) with initial thickness of 80  $\mu\text{m}$  after cycling

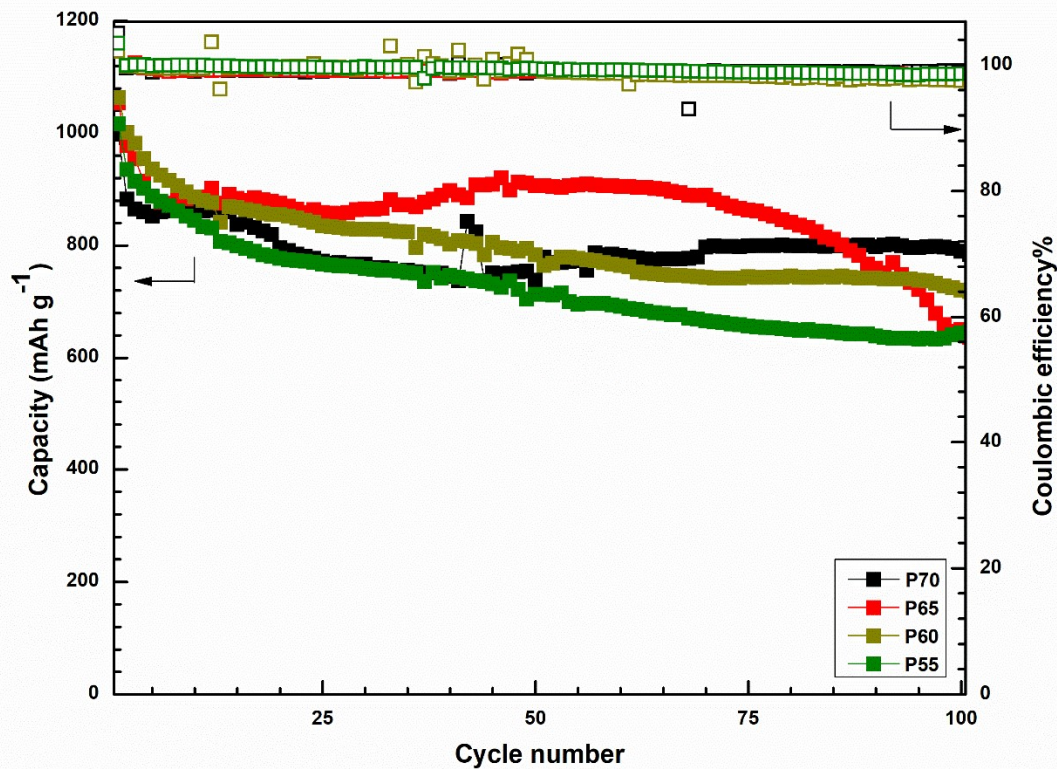

**Supplementary Figure 2.** Cycle performance of cells with the sulfur loading of  $2.5 \text{ mg cm}^{-2}$  at a different porosity of 70%, 65%, 60%, and 55%

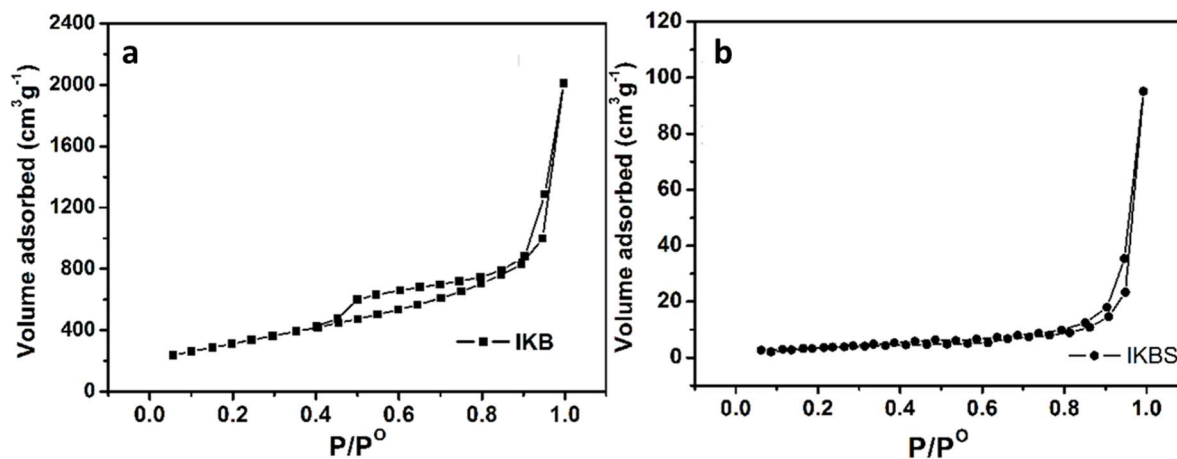

**Supplementary Figure 3.** Nitrogen sorption isotherms of (a) integrated KB (IKB) with a specific surface area of 1148  $\text{m}^2 \text{g}^{-1}$  and pore volume of 3.08  $\text{cm}^3 \text{g}^{-1}$ , and (b) S/IKB with a specific surface area of 12  $\text{m}^2 \text{g}^{-1}$  and pore volume of 0.15  $\text{cm}^3 \text{g}^{-1}$ .

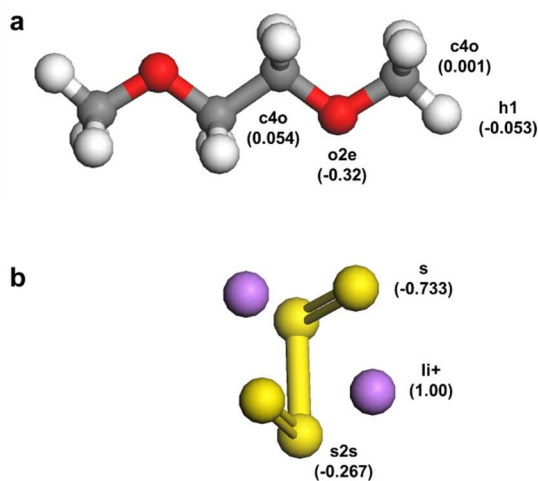

**Supplementary Figure 4.** The configurations of DME (a) and  $\text{Li}_2\text{S}_4$  (b) with labeled force field type and charge

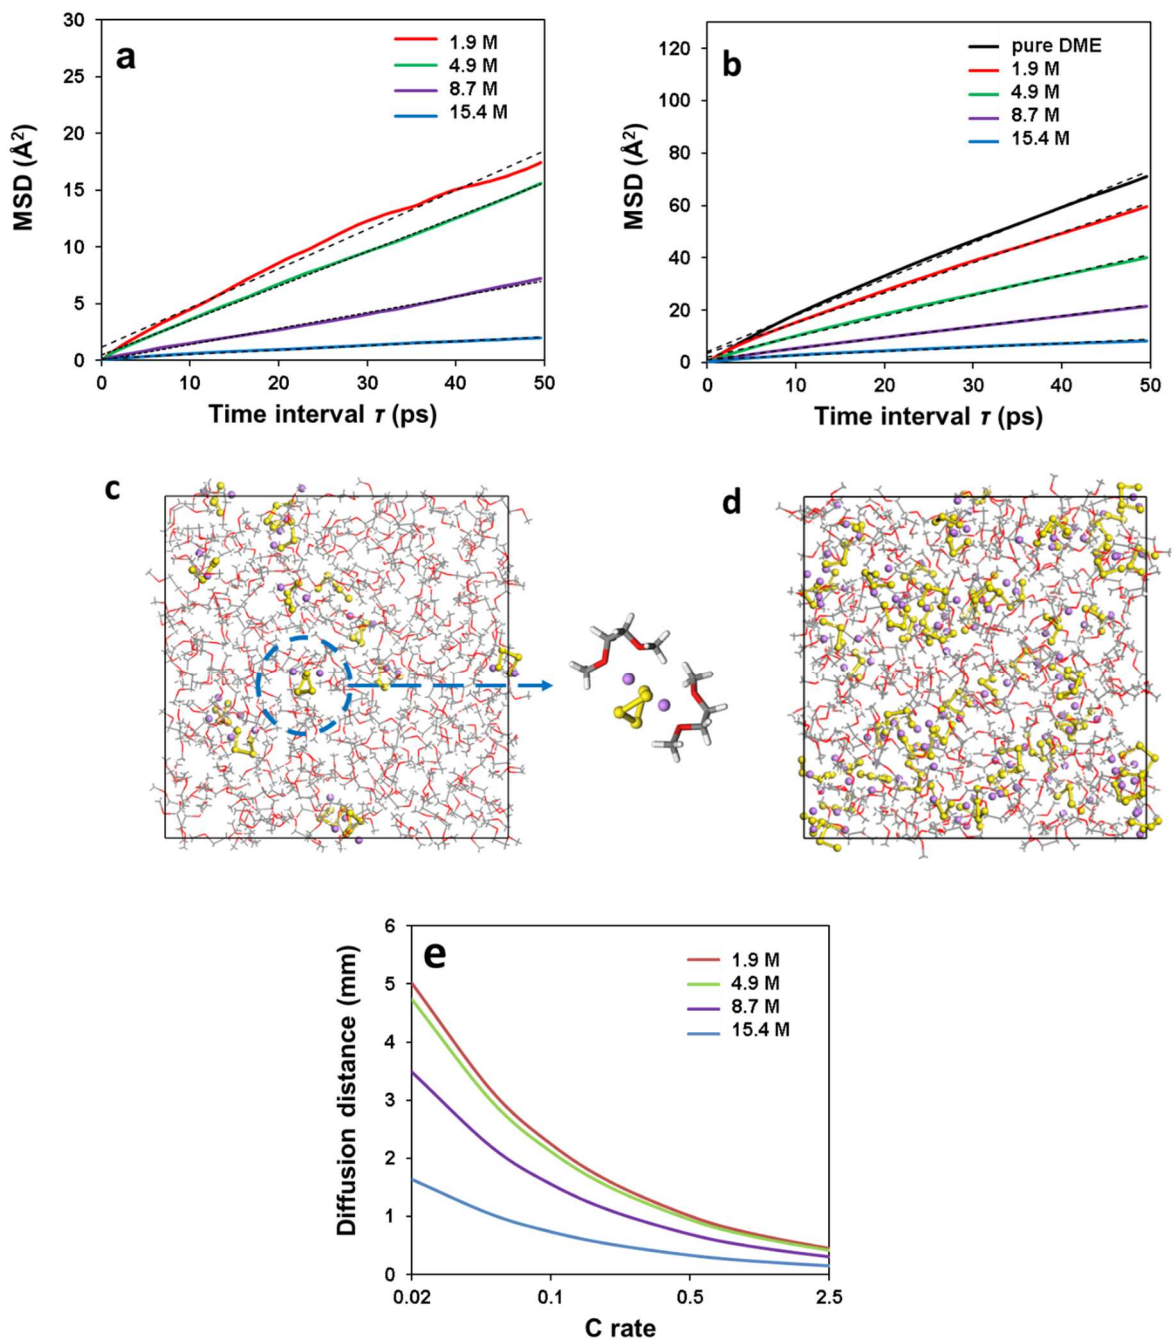

**Supplementary Figure 5.** Simulated average mean squared displacement (MSD) of  $\text{Li}_2\text{S}_4$  (a) and DME (b) as a function of simulation time in each solution. A typical snapshot of solution 2.1 M (c) and saturated 8.7 M (d) solution. Estimated self-diffusion distance of  $\text{Li}_2\text{S}_4$  as a function of C-rate in each solution (e).

## Supplementary Tables

**Supplementary Table 1.** Composition of materials used in the composite cathode

| Materials                              | S    | Carbon matrix | Carbon black | CMC-SBR | Total |
|----------------------------------------|------|---------------|--------------|---------|-------|
| Mass (mg)                              | 6.50 | 1.85          | 1.95         | 0.65    | 10.93 |
| Weight percentage (%)                  | 59.1 | 16.9          | 18           | 6.0     | 100   |
| Compact density ( $\text{g cm}^{-3}$ ) | 2.07 | 2.26          | 1.90         | 1.90    | -     |
| Dense volume ( $\text{mm}^3$ )         | 3.14 | 0.81          | 1.02         | 0.34    | 5.31  |

**Supplementary Table 2.** Estimated E/S ratio of coin cell (Unit:  $\mu\text{l mg}^{-1}$ )

| Porosity<br>Areal capacity ( $\text{mAh cm}^{-2}$ ) | 70%  | 60%  | 50%  | 40%  |
|-----------------------------------------------------|------|------|------|------|
| 1                                                   | 5.15 | 4.22 | 3.68 | 3.30 |
| 2                                                   | 3.80 | 2.91 | 2.39 | 2.02 |
| 3                                                   | 3.37 | 2.48 | 1.94 | 1.58 |
| 4                                                   | 3.16 | 2.26 | 1.72 | 1.36 |
| 5                                                   | 3.03 | 2.14 | 1.59 | 1.22 |



**Supplementary Table 3.** List of parameters

| Symbol           | Description                                                                                                     | Category            | Value                                                    |
|------------------|-----------------------------------------------------------------------------------------------------------------|---------------------|----------------------------------------------------------|
| $V_{pore}$       | Total pore volume in cathode region                                                                             | Function of $p$     | -                                                        |
| $V_{pore}(sep)$  | Pore volume in separator                                                                                        | Measured constant   | 2.5 mm <sup>3</sup>                                      |
| $V_{pore}(cat)$  | Pore volume in cathode                                                                                          | Function of $p$     | -                                                        |
| $V_{dense}(cat)$ | volume of dense cathode materials without any porosity                                                          | Measured constant   | 5.3 mm <sup>3</sup>                                      |
| $p$              | Porosity                                                                                                        | Variable            | -                                                        |
| $P_s(uti)$       | Utilization percentage of S in the first plateau                                                                | Function of $p$     | -                                                        |
| $m_s(uti)$       | Mass of utilized S in the first plateau                                                                         | Function of $p$     | -                                                        |
| $m_s(total)$     | Total mass of S in the cathode                                                                                  | Measured constant   | 6.5 mg                                                   |
| $Q_{pr}$         | Practical capacity in the first plateau                                                                         | Function of $p$     | -                                                        |
| $Q_{th}$         | Theoretical capacity in the first plateau                                                                       | Calculated constant | 420 mAh g <sup>-1</sup>                                  |
| $g$              | Parameter to include extra Li-PS into bulk electrolyte                                                          | Matching constant   | 1.8                                                      |
| $S_{max}$        | Saturated concentration of Li-PS in the electrolyte solvent in terms of S                                       | Measured constant   | 8 mol L <sup>-1</sup>                                    |
| $M_s$            | Molar mass of S                                                                                                 | Constant            | 32 g mol <sup>-1</sup>                                   |
| $c_s(uti)$       | Practical concentration of Li-PS due to the saturation limit                                                    | Function of $p$     | -                                                        |
| $A_0$            | Surface area of carbon matrix per gram                                                                          | Function of $p$     | -                                                        |
| $\alpha$         | Empirical constant to describe the relationship between $A_0$ and $V_0$                                         | Empirical constant  | 1                                                        |
| $A_0$            | Constant to match the BET measured surface area of carbon matrix with 70 % porosity                             | Matching constant   | 300 m <sup>2</sup> g <sup>-1</sup>                       |
| $A_{eff}$        | Effective surface area                                                                                          | Function of $p$     | -                                                        |
| $k$              | Ratio between the mass of non-utilized S and its covering surface area                                          | Fitting parameter   | $1.27 \times 10^5$ m <sup>2</sup> g <sup>-2</sup>        |
| $R$              | Tunneling resistance caused by the deposited Li <sub>2</sub> S <sub>2</sub> /Li <sub>2</sub> S layer            | Function of $p$     | -                                                        |
| $C$              | Parameter to describe the relationship between tunneling resistance and layer thickness. Later combined to $C'$ |                     | -                                                        |
| $B$              | Parameter to describe the relationship between tunneling resistance and layer thickness. Later combined to $B'$ |                     | -                                                        |
| $d$              | Thickness of Li <sub>2</sub> S <sub>2</sub> /Li <sub>2</sub> S layer                                            | Function of $p$     | -                                                        |
| $Q$              | Total capacity in the discharging curve                                                                         | Variable            | -                                                        |
| $b$              | Parameter to describe the relationship between thickens and total capacity. Later combined to $B'$              |                     | -                                                        |
| $m_c$            | Mass of carbon matrix in the cathode                                                                            | Measured constant   | 1.85 mg                                                  |
| $I$              | Discharging current, later combined to $C'$                                                                     | Measured constant   | -                                                        |
| $B'=Bb$          | Parameters to describe relationship between discharging voltage and capacity                                    | Fitting parameter   | $1.07 \times 10^{-3}$ m <sup>2</sup> g mAh <sup>-1</sup> |
| $C'=CI$          | Parameters to describe relationship between discharging voltage and capacity                                    | Fitting parameter   | 0.050 V                                                  |

**Supplementary Table 4.** List of composition, density, Li-PS concentration and diffusion coefficient of DME and Li<sub>2</sub>S<sub>4</sub> in each solution

| Solution | N(Li <sub>2</sub> S <sub>4</sub> ) :<br>N(DME) | Density<br>(g cm <sup>-3</sup> ) | <i>c</i> <sub>s</sub><br>(mol L <sup>-1</sup> ) | <i>D</i> (DME)<br>(10 <sup>-10</sup> m <sup>2</sup> s <sup>-1</sup> ) | <i>D</i> (Li <sub>2</sub> S <sub>4</sub> )<br>(10 <sup>-10</sup> m <sup>2</sup> s <sup>-1</sup> ) |
|----------|------------------------------------------------|----------------------------------|-------------------------------------------------|-----------------------------------------------------------------------|---------------------------------------------------------------------------------------------------|
| Pure DME | 0:300                                          | 0.88                             | 0                                               | 23.1                                                                  | -                                                                                                 |
| 1.9 M    | 14:280                                         | 0.94                             | 1.9                                             | 19.1                                                                  | 5.6                                                                                               |
| 4.9 M    | 39:299                                         | 1.01                             | 4.9                                             | 13.0                                                                  | 5.0                                                                                               |
| 8.7 M    | 60:240                                         | 1.10                             | 8.7                                             | 6.9                                                                   | 2.7                                                                                               |
| 15.4 M   | 100:200                                        | 1.24                             | 15.4                                            | 2.5                                                                   | 0.6                                                                                               |

## Supplementary Reference

1. Chanbum Park, Matej Kanduč, Richard Chudoba, Arne Ronneburg, Sebastian Risse, Matthias Ballauff, Joachim Dzubiella. Molecular simulations of electrolyte structure and dynamics in lithium–sulfur battery solvents. *Journal of Power Sources*, 2018, 373, 70–78.
2. Kikuko Hayamizu, Yuichi Aihara, Shigemasa Arai, Cirilo Garcia Martinez. Pulse-Gradient Spin-Echo  $^1\text{H}$ ,  $^7\text{Li}$ , and  $^{19}\text{F}$  NMR Diffusion and Ionic Conductivity Measurements of 14 Organic Electrolytes Containing  $\text{LiN}(\text{SO}_2\text{CF}_3)_2$ . *The Journal of Physical Chemistry B*, 1999, 103, 519-524.
